# Supplementary material for: Transmission Dynamics of Zika Virus in Island Populations: A Modelling Analysis of the 2013–14 French Polynesia Outbreak
Source: PLOS journal article supplement (doi:10.1371/journal.pntd.0004726), 2016-05-17
Supplement: S13 (10.1371/journal.pntd.0004726.s013) [file journal.pntd.0004726.s013]

Table S2: **Estimated parameters for ZIKV infection when prior distributions with  $\sigma = 2$  are used.** Estimates for the basic reproduction number,  $R_0$ ; the proportion of infected individuals that were reported as suspected cases at sentinel sites; and the total proportion of the population infected (including both symptomatic and asymptomatic cases, with reports following a negative binomial distribution with reporting proportion  $r$  and dispersion parameter  $\phi$ ). Median estimates are given, with 95% credible intervals in parentheses.

| Region          | $R_0$         | Reported (%) | Infected (%) |
|-----------------|---------------|--------------|--------------|
| Tahiti          | 3.7 (2.6-7.8) | 11 (5.7-20)  | 95 (89-99)   |
| Sous-le-vent    | 3.9 (2.9-7.4) | 11 (8-15)    | 96 (90-100)  |
| Moorea          | 4.8 (3.1-11)  | 7.1 (3.9-12) | 97 (91-100)  |
| Tuamotu-Gambier | 2.9 (2-8.2)   | 6.9 (3.4-12) | 90 (78-97)   |
| Marquises       | 2.6 (1.8-4)   | 9.4 (3-21)   | 87 (73-96)   |
| Australes       | 3.1 (2-7.5)   | 17 (8.1-30)  | 89 (78-97)   |
